# Supplementary material for: Oceanographic dataset collected during the 2021 scientific expedition of the Canadian Coast Guard Ship Amundsen
Source: Copernicus journal article supplement (doi:10.5194/essd-2023-204), 2023-08-15
Supplement: Supplementary file 1 [file essd-2023-204-supplement.pdf]

## ***Amundsen* Science Core Data License, Acknowledgment and Reference**

Dear Data User,

*Amundsen* Science datasets are licensed under the Creative Commons Attribution 4.0 International (CC BY 4.0) Public License. A summary of the license is available at <https://creativecommons.org/licenses/by/4.0/>. By using *Amundsen* Science data, you accept the terms and conditions of this License. The license grants the public the rights to use and share the data and results derived therefrom as long as the proper acknowledgement is given to the data licensor that any alteration to the data is clearly indicated, and that a link to the original data and the license is made available. A citation reference for the publication should also be sent to the *Amundsen* Science Data Coordinator ([amundsen.data@as.ulaval.ca](mailto:amundsen.data@as.ulaval.ca)) for inclusion in a publication list on the *Amundsen* website.

The acknowledgement to the data licensor must be included in the Acknowledgements section of the publication. A reference to the data must be included within the text where the use of the data is described and in the reference list.

### **Acknowledgement Section**

Please include this statement in a paragraph at the end of your publication, before the reference list.

[Some of] The data presented herein were collected by the Canadian research icebreaker CCGS *Amundsen* and made available by the *Amundsen* Science program, which is supported by the Canada Foundation for Innovation Major Science Initiatives Fund. The views expressed in this publication do not necessarily represent the views of *Amundsen* Science or that of its partners.

### **Reference Section**

*Amundsen* Science Data Collection. [YEAR(s)]. CTD-Rosette data collected by the CCGS *Amundsen* in the Canadian Arctic. Arcticnet Inc., Québec, Canada. Processed data. Version [Version Number]. Archived at [www.polardata.ca](http://www.polardata.ca), Canadian Cryospheric Information Network (CCIN), Waterloo, Canada. doi: 10.5884/12713. Accessed on [Date].

Note: Raw data are made available upon request only.  
Raw data are: Licensed under CC0 4.0 CC-BY.  
Not processed data or have undergone limited verification. Users must clearly indicate any alteration made to the raw data

Proper acknowledgement and citation of the data allow for the tracking of the scientific output of the *Amundsen* Science program and is important for the CCGS *Amundsen's* continued support of the scientific community.

Thank you for your collaboration

*Amundsen* Science Data Coordinator
